# Supplementary material for: A Cross-Sectional Survey of Bacterial Species in Plaque from Client Owned Dogs with Healthy Gingiva, Gingivitis or Mild Periodontitis
Source: PubMed Central journal article supplement (PMC3862762; doi:10.1371/journal.pone.0083158), 2013-12-13

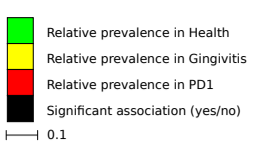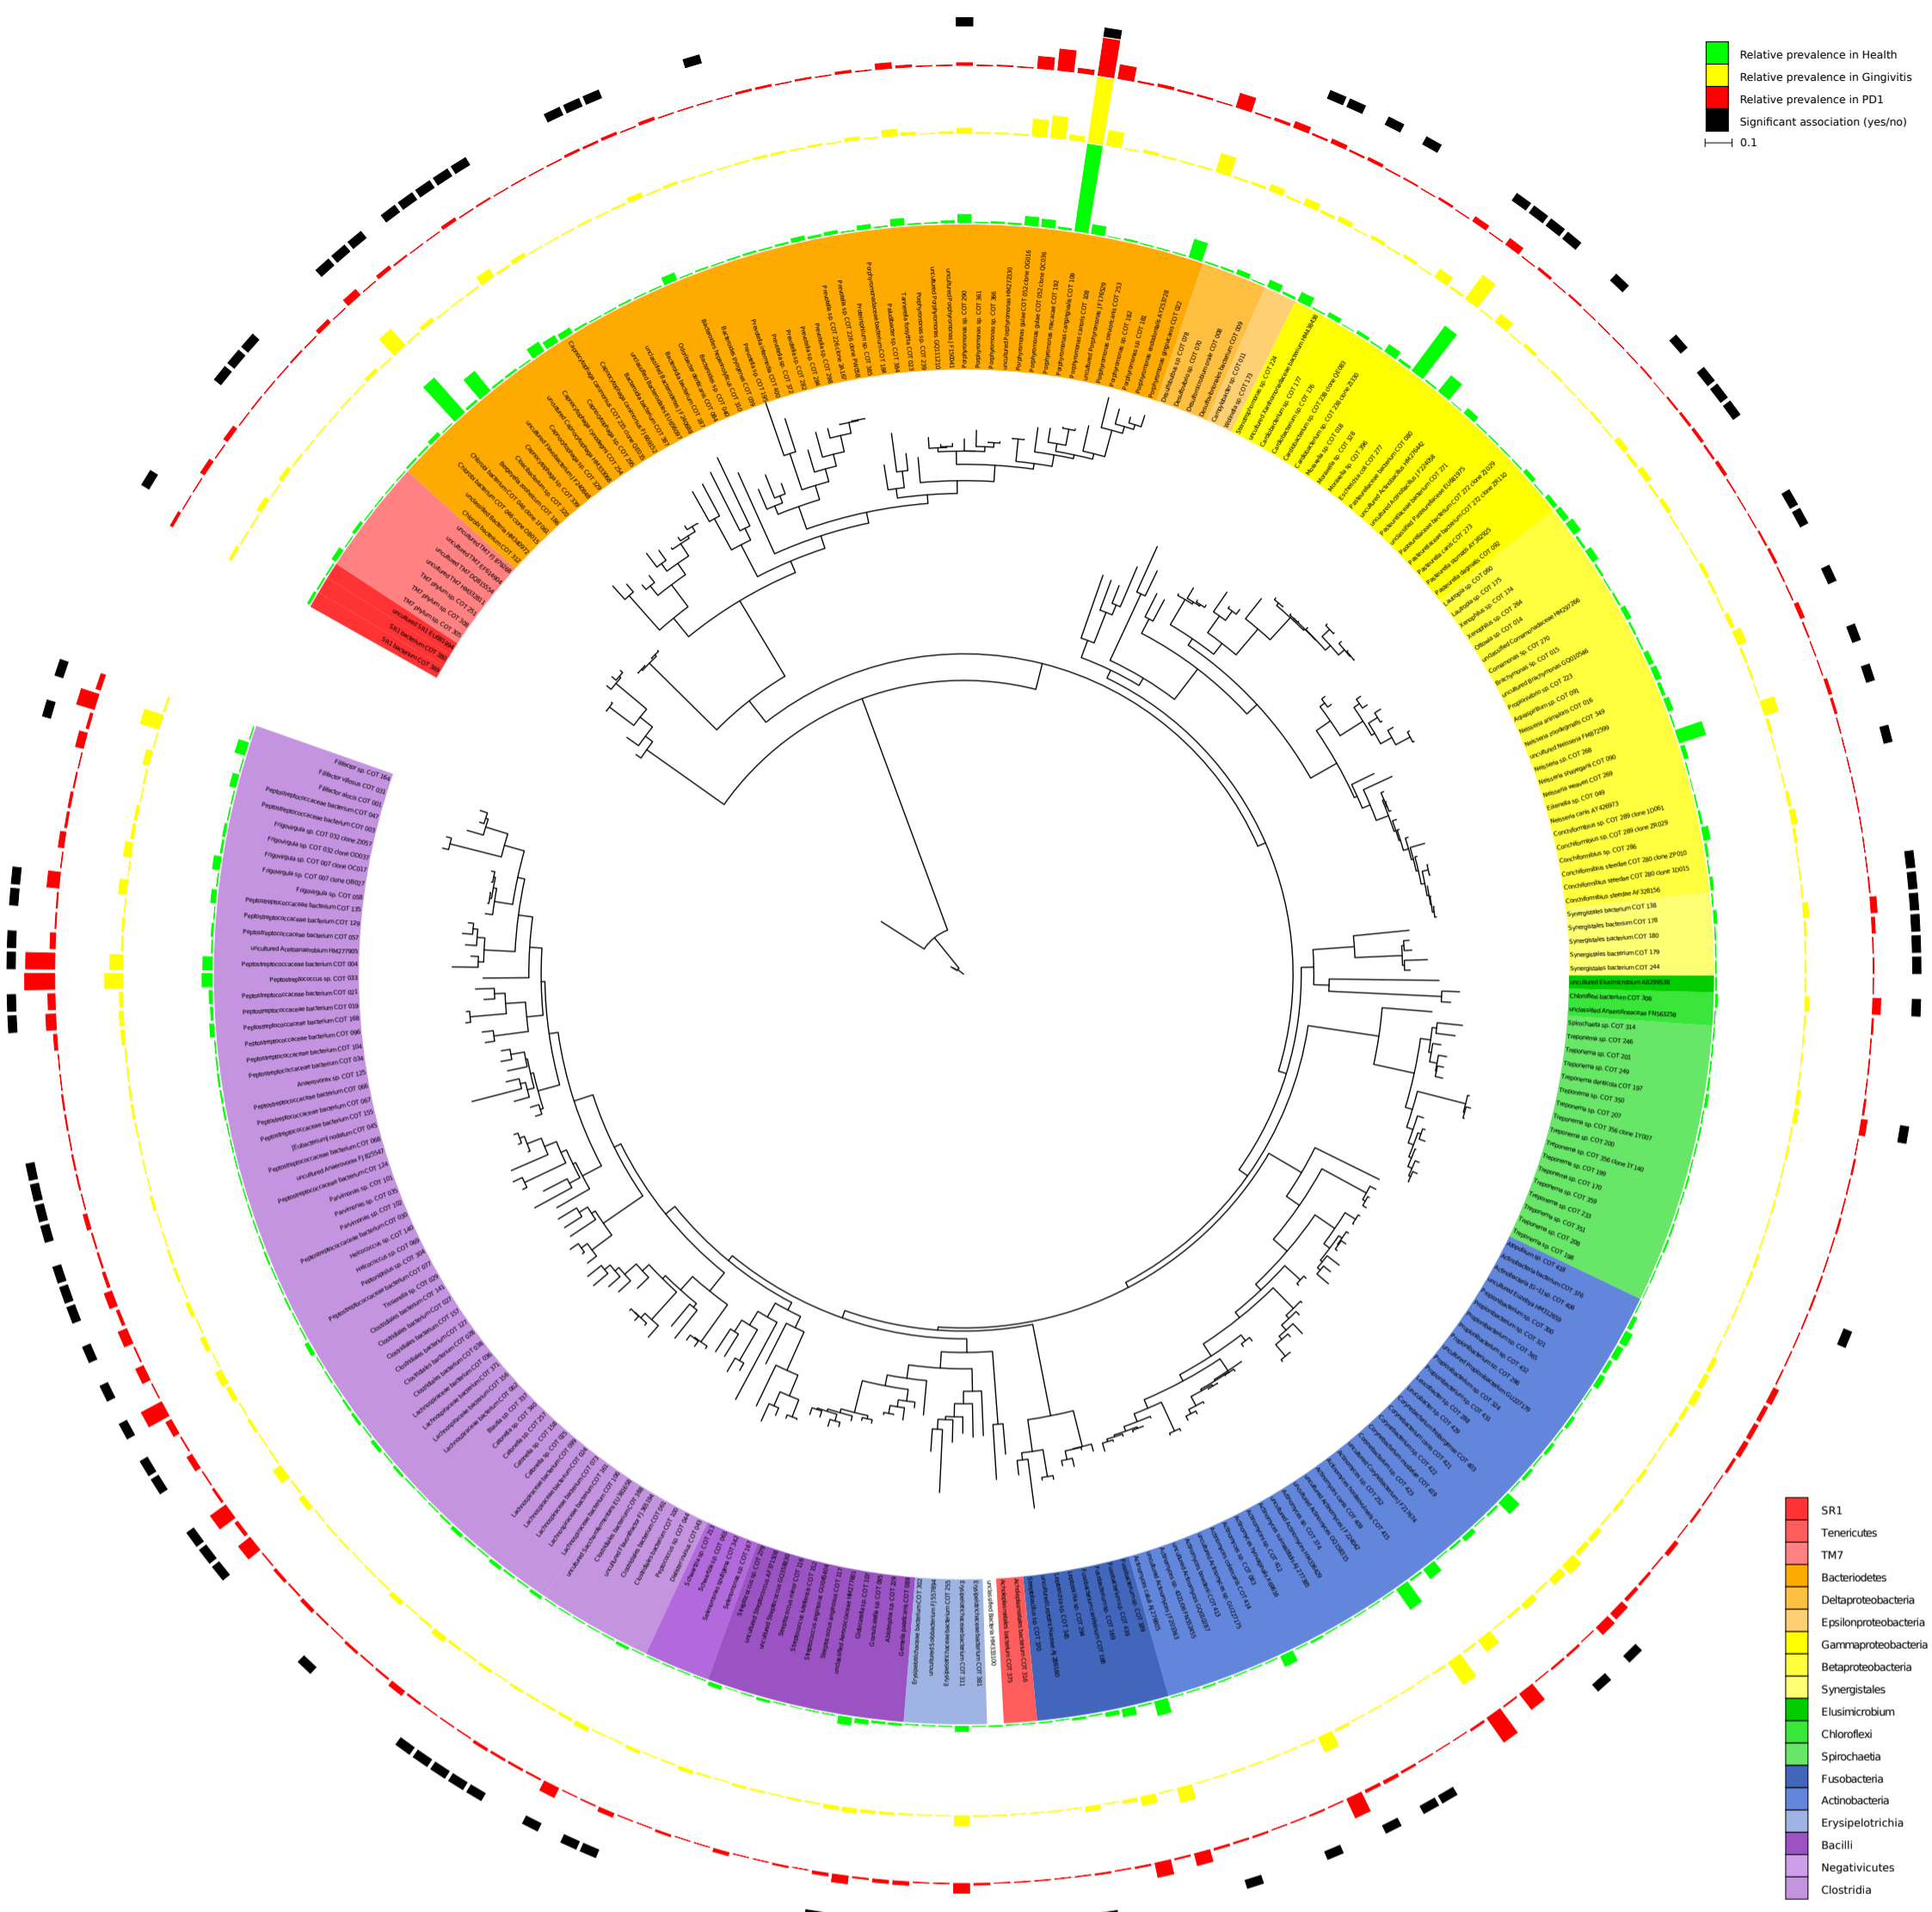

Supplement: pone.0083158.s001.pdf [file pone.0083158.s001.pdf]
